# Supplementary material for: Effects of Loigolactobacillus coryniformis K8 CECT 5711 on the Immune Response of Elderly Subjects to COVID-19 Vaccination: A Randomized Controlled Trial
Source: MDPI journal article supplement (doi:10.3390/nu14010228), 2022-01-05
Supplement: s1 [file s1]

## **Supplementary material and methods**

The severity of the SARS-CoV-2 infection was determined according to NIH criteria as:

- Asymptomatic Infection: Individuals who test positive for SARS-CoV-2 using a virologic test (i.e., a nucleic acid amplification test [NAAT] or an antigen test) but who have no symptoms that are consistent with COVID-19.
- Mild Illness: Individuals who have any of the various signs and symptoms of COVID-19 (e.g., fever, cough, sore throat, malaise, headache, muscle pain, nausea, vomiting, diarrhea, loss of taste and smell) but who do not have shortness of breath, dyspnea, or abnormal chest imaging.
- Moderate Illness: Individuals who show evidence of lower respiratory disease during clinical assessment or imaging and who have an oxygen saturation (SpO<sub>2</sub>) ≥94% on room air at sea level.
- Severe Illness: Individuals who have SpO<sub>2</sub> <94% on room air at sea level, a ratio of arterial partial pressure of oxygen to fraction of inspired oxygen (PaO<sub>2</sub>/FiO<sub>2</sub>) <300 mm Hg, respiratory frequency >30 breaths/min, or lung infiltrates >50%.
- Critical Illness: Individuals who have respiratory failure, septic shock, and/or multiple organ dysfunction.

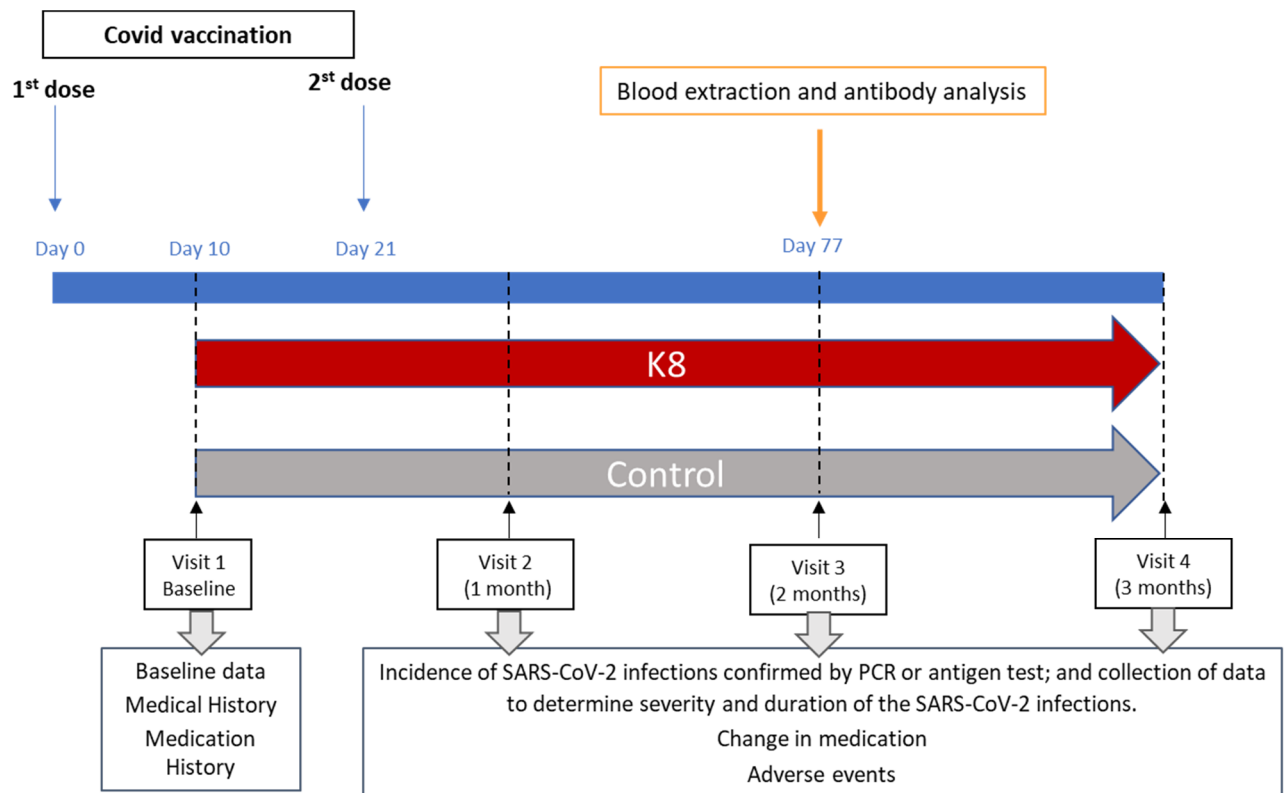

**Figure S1.** Flow chart of study procedures

**Table S1.** Baseline medication of the subjects participating in the study.

|                               | <b>All volunteers<br/>(n=198)</b> | <b>Control group<br/>(n=100)</b> | <b>Probiotic group<br/>(n=98)</b> | <b><i>P</i><br/>between-<br/>groups</b> |
|-------------------------------|-----------------------------------|----------------------------------|-----------------------------------|-----------------------------------------|
| Alzheimer drugs               | 24 (12.1%)                        | 13 (13.0%)                       | 11 (11.2%)                        | 0.702                                   |
| Analgesics                    | 101 (51.0%)                       | 49 (49.0%)                       | 52 (53.1%)                        | 0.568                                   |
| Iron tablets                  | 39 (19.7%)                        | 22 (22.0%)                       | 17 (17.3%)                        | 0.410                                   |
| Anxiolytics                   | 134 (67.7%)                       | 68 (68.0%)                       | 76 (77.6%)                        | 0.131                                   |
| Antibiotics                   | 11 (5.5%)                         | 6 (6.0%)                         | 8 (8.2%)                          | 0.553                                   |
| Antidiabetic drugs            | 43 (21.7%)                        | 21 (21.0%)                       | 22 (22.4%)                        | 0.805                                   |
| Antiepileptic drugs           | 57 (29.1%)                        | 29 (29.0%)                       | 28 (28.6%)                        | 0.947                                   |
| Antihypertensive drugs        | 84 (42.2%)                        | 38 (38.0%)                       | 44 (44.9%)                        | 0.357                                   |
| Parkinson drugs               | 29 (14.6%)                        | 11 (11.0%)                       | 18 (18.2%)                        | 0.151                                   |
| Antipsychotic drugs           | 106 (53.3%)                       | 51 (51.0%)                       | 55 (55.6%)                        | 0.520                                   |
| Glucocorticoids               | 11 (5.5%)                         | 4 (4%)                           | 7 (7.1%)                          | 0.343                                   |
| Diuretics                     | 59 (29.6%)                        | 32 (30.0%)                       | 29 (29.3%)                        | 0.714                                   |
| Lipids drugs                  | 71 (35.7%)                        | 34 (34.0%)                       | 36 (36.7%)                        | 0.687                                   |
| Dyspepsia drugs               | 126 (63.3%)                       | 62 (62%)                         | 64 (64.6%)                        | 0.699                                   |
| CV drugs                      | 65 (32.7%)                        | 32 (32.0%)                       | 34 (34.7%)                        | 0.688                                   |
| Vitamins and Food supplements | 74 (37.2%)                        | 31 (31.0%)                       | 43 (43.4%)                        | 0.081                                   |

Data are presented as n (%). *P* indicates differences between the control group and the probiotic group.

**Table S2.** Summary of statistics for SARS-CoV-2 S1 RBD IgG and IgA antibody response.

|                        | Control group |                              | Probiotic Group |                                | <i>P</i> between-groups * |  |
|------------------------|---------------|------------------------------|-----------------|--------------------------------|---------------------------|--|
|                        | N             | Geometric mean (95% CI)      | N               | Geometric mean (95% CI)        |                           |  |
| ALL SUBJECTS           |               |                              |                 |                                |                           |  |
| IgG (U/mL)             | 97            | 17,473.93 (730.2-418,141.8)  | 96              | 63,676.59 (858.7-509,335.5)    | 0.552                     |  |
| IgA (U/mL)             | 97            | 23,693.66 (121.5-146,923.4)  | 96              | 29,326.93 (156.3-184,624.2)    | 0.422                     |  |
| COVID-19 PATIENTS      |               |                              |                 |                                |                           |  |
| IgG (U/mL)             | 6             | 50,148.2 (7,480.1-336,202.8) | 10              | 170,054.4 (93,841.8-30,8162.5) | 0.038                     |  |
| IgA (U/mL)             | 6             | 50,059.2 (9,798.7-255,739.6) | 10              | 73,996.1 (31,961.7-171,312)    | 0.558                     |  |
| NO COVID-19 PATIENTS   |               |                              |                 |                                |                           |  |
| IgG (U/mL)             | 91            | 16,300.5 (11,866.5-22,391.2) | 86              | 16,390.4 (11,887.8-22,598.4)   | 0.579                     |  |
| IgA (U/mL)             | 91            | 3,589.7 (2,335.7-5,517)      | 86              | 3,959.7 (2,587.9-6,058.6)      | 0.297                     |  |
| SUBJECTS <85 years old |               |                              |                 |                                |                           |  |
| IgG (U/mL)             | 43            | 25,842 (17,781.8-37,555.8)   | 46              | 24,531.6 (16,405.5-36,682.7)   | 0.753                     |  |
| IgA (U/mL)             | 43            | 4,389.4 (2,270-8,487.5)      | 46              | 3,278.4 (1,826.4-5,884.7)      | 0.183                     |  |
| SUBJECTS ≥85 years old |               |                              |                 |                                |                           |  |
| IgG (U/mL)             | 48            | 10,787.5 (6,716.2-17,326.7)  | 40              | 10,308.1 (6,387.9-16,634.1)    | 0.625                     |  |
| IgA (U/mL)             | 48            | 2,997.9 (1,707.6-5,263.3)    | 40              | 4,920 (2,645.7-9,149.3)        | 0.082                     |  |

Data are presented as geometric mean (95% Confidence Interval) \**P* value indicated differences between the probiotic group and the control group in each subgroup analysis (Univariate model adjusted by sex, age and disease index in all subjects; age, sex, disease index and time to Covid-19 symptom resolution in Covid-19 patients; by sex, age, disease index and glucocorticoids in subjects that did not have Covid-19 infections; and by sex, disease index and glucocorticoids in the analysis by age (<85 years old and ≥85 years old)

**Table S3.** Summary of statistics for cytokynes levels

|                        | Control group |              | Probiotic Group |              | P between-groups * |
|------------------------|---------------|--------------|-----------------|--------------|--------------------|
|                        | N             | Mean (SD)    | N               | Mean (SD)    |                    |
| ALL SUBJECTS           |               |              |                 |              |                    |
| INF-g (pg/mL)          | 97            | 1.04 (3.08)  | 94              | 1.36 (3.41)  | 0.502              |
| TGF-β (pg/mL)          | 97            | 12.12 (3.36) | 94              | 11.84 (2.95) | 0.575              |
| COVID-19 PATIENTS      |               |              |                 |              |                    |
| INF-g (pg/mL)          | 6             | 0.67 (0.74)  | 9               | 2.07 (4.14)  | 0.455              |
| TGF-β (pg/mL)          | 6             | 12.77 (4.94) | 9               | 13.48 (2.87) | 0.486              |
| NO COVID-19 PATIENTS   |               |              |                 |              |                    |
| INF-g (pg/mL)          | 91            | 1.06 (3.18)  | 85              | 1.28 (3.34)  | 0.694              |
| TGF-β (pg/mL)          | 91            | 12.08 (3.27) | 85              | 11.66 (2.98) | 0.430              |
| SUBJECTS <85 years old |               |              |                 |              |                    |
| INF-g (pg/mL)          | 43            | 0.99 (2.82)  | 46              | 1.69 (4.37)  | 0.618              |
| TGF-β (pg/mL)          | 43            | 11.89 (3.00) | 46              | 11.23 (2.48) | 0.280              |
| SUBJECTS ≥85 years old |               |              |                 |              |                    |
| INF-g (pg/mL)          | 48            | 1.12 (3.50)  | 40              | 0.80 (1.31)  | 0.988              |
| TGF-β (pg/mL)          | 48            | 12.24 (3.52) | 40              | 12.18 (3.34) | 0.822              |

Data are presented as mean (SD). \* *P* value indicated differences between the probiotic group and the control group in each subgroup analysis (Univariate model adjusted by sex, age and disease index in all subjects; age, sex, disease index and time to COVID-19 symptom resolution in Covid-19 patients; by sex, age, disease index and glucocorticoids in subjects that did not have Covid-19 infections; and by sex, disease index and glucocorticoids in the analysis by age (<85 years old and  $\geq$ 85 years old)
